# Supplementary material
Source: MDPI journal article supplement (https://www.mdpi.com/1661-3821/3/3/25)
Supplement: s1 [file s1]

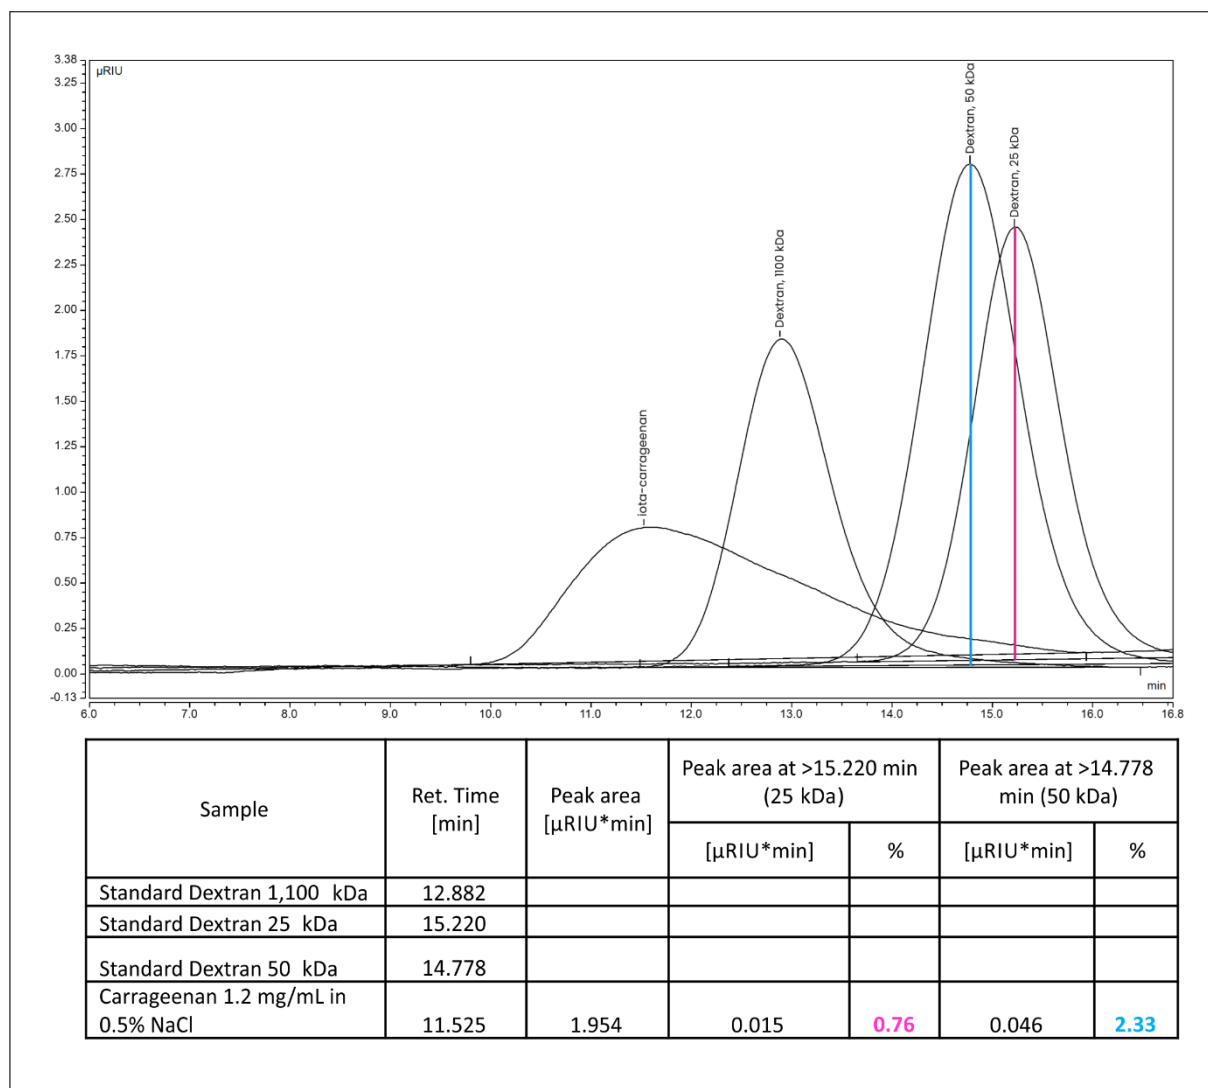

**Figure S2.** Molecular weight (MW) distribution of iota-carrageenan using size exclusion chromatography (SEC). The MW distribution of highly pure iota-carrageenan was determined using SEC. As carrageenan standards with a defined size are not commercially available, dextran standards (1100, 50, 25 kDa) were applied. The carrageenan peak was split into two peaks at the medium retention times of the 25 and 50 kDa dextran standard (15.22 and 14.78 min, shown by a pink and blue line). The resulting peak areas of the small molecular weight fractions, i.e. peak areas at retention times higher than the retention time of the corresponding dextran standard, were set into relation to the total carrageenan peak area. The ratio of carrageenan with a molecular weight of smaller than 50 and 25 kDa is 2.33 and 0.76 %, respectively. Kappa- and lambda-carrageenan were analyzed accordingly; both have a MW of > 670kDa.

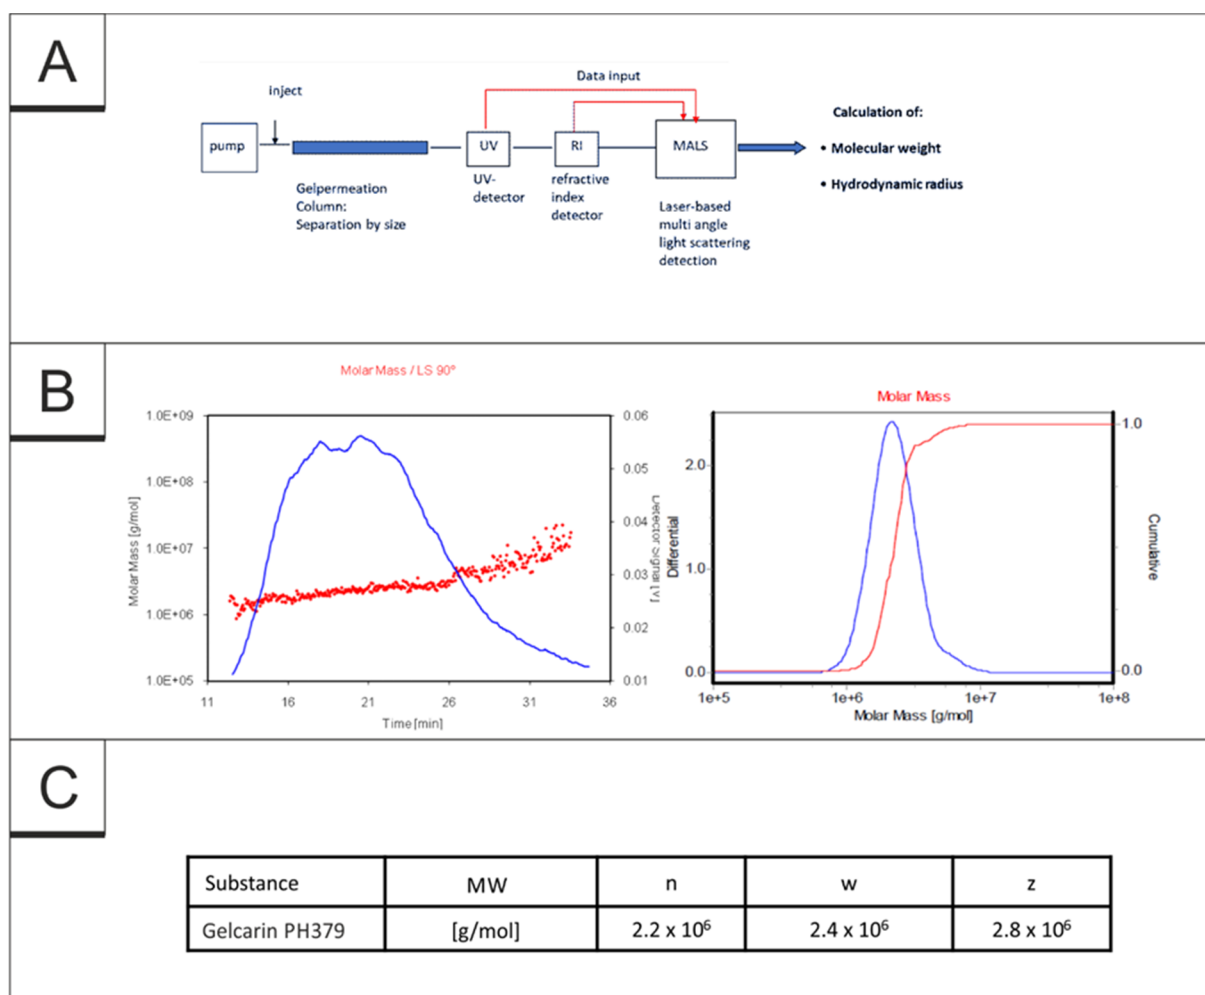

**Figure S3.** Molecular weight (MW) determination of iota-carrageenan by gel permeation HPLC and dynamic light scattering. Schematic structure of MW determination by gel permeation HPLC and light scattering (A). Molecular weight (red dots) of iota-carrageenan (Gelcarin PH379) dissolved in 0.5% NaCl plotted against the elution time. The 90° light scattering signal is shown in blue (B, left panel). Differential (blue line) and cumulative (red line) molecular mass of iota-carrageenan dissolved in 0.5 % NaCl (B, right panel). A sample of iota-carrageenan with typical molecular weight distribution (C). Three different averages for the radii and the molar masses were determined. They differ in their weighting factors, indicated by “n” = number average (weighting factor is proportional to the number of particles), “w” = weight or mass average (arbitrary mass average if measuring an unseparated sample with static light scattering), and “z” = average from the ultracentrifuge (UZ) technology. The molar mass was calculated based on the literature value for the refractive index increment of 0.148 ml/g. The average MW distributions of the sample were between  $2.2 - 2.9 \times 10^6$  g/mol. Iota-carrageenan does not contain material  $< 100000$  g/mol.

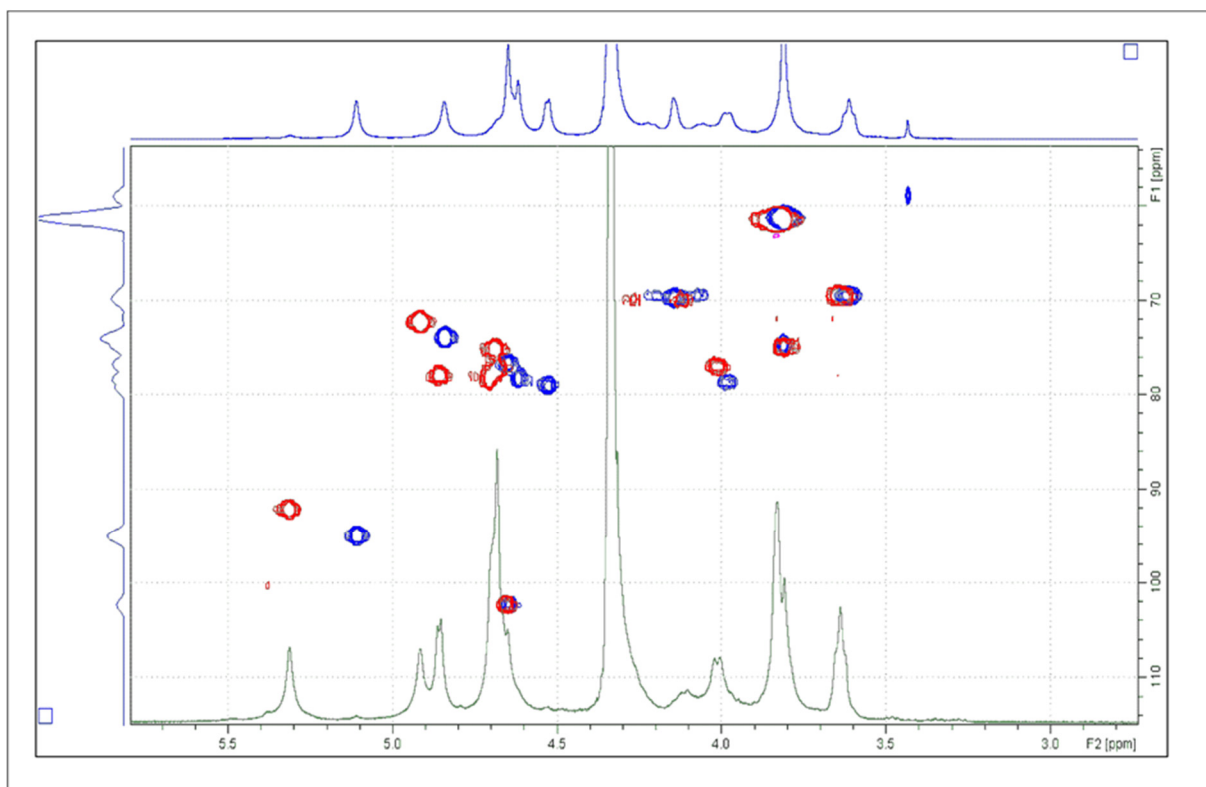

**Figure S4.** Identification and purity analysis of iota-carrageenan by 2D <sup>1</sup>H NMR spectroscopy. HSQC-NMR-Spectra of kappa- (blue) and iota- (red) carrageenan were recorded at 70°C.

| Country              | Nasal Spray<br>(iota-carrageenan)                               | Nasal Spray Children<br>(iota-carrageenan)   | Nasal Spray<br>(iota- and kappa-carrageenan) | Nasal Spray decongestant<br>(iota- and kappa-carrageenan)  | Throat Spray<br>(iota-carrageenan) | Lozenges<br>(iota-carrageenan) |
|----------------------|-----------------------------------------------------------------|----------------------------------------------|----------------------------------------------|------------------------------------------------------------|------------------------------------|--------------------------------|
| Australia            | Betadine Cold Defence Nasal Spray                               |                                              | FLO Travel Nasal Spray                       |                                                            |                                    |                                |
| Austria              | Coldam aris prophylactic<br>Nasenspray, Carravir Protect Nasen- | COLDAMARS prophylactic Junior Nasal<br>Spray | Coldam aris Plus Nasal Spray                 | Coldam aris akut Nasenspray                                | Coldam aris Rachenspray            | Coldam aris Pastillen          |
| Bahrain              | Betadine Cold Defence Nasal Spray                               | Betadine Cold Defence Children's Nasal       |                                              |                                                            |                                    |                                |
| Belgium              |                                                                 |                                              |                                              | Physiom er Virus Defense                                   |                                    |                                |
| Bulgaria             |                                                                 |                                              | GripVis Nasal Spray                          |                                                            | GripVis Throat Spray               | GripVis Lozenges               |
| Denmark              |                                                                 |                                              | Viruseptin Nose Spray                        | Viruseptin Decongestant Spray,<br>Physiom er Virus Defense | Viruseptin Throat Spray            | Viruseptin Lozenges            |
| Estonia              |                                                                 |                                              | Agovirax Nasal Spray                         |                                                            |                                    |                                |
| Finland              |                                                                 |                                              | Viruseptin Nose Spray                        | Physiom er Virus Defense                                   | Viruseptin Throat Spray            |                                |
| France               |                                                                 |                                              |                                              | Phytosun Stop Virus                                        |                                    |                                |
| Germany              |                                                                 | Algovir Kinder                               | Algovir Effekt                               |                                                            |                                    |                                |
| Greece               |                                                                 |                                              | lovir                                        | lovir Plus+ Nasal Spray                                    | lovir Throat Spray                 |                                |
| Hungary              |                                                                 | Carrevir Kid Orrspray                        | Carrevir Orrspray                            |                                                            |                                    |                                |
| Indonesia            | Betadine Cold Defence Nasal Spray                               | Betadine Kids Cold Defence Nasal Spray       |                                              |                                                            |                                    |                                |
| Iran                 | Coldam aris prophylactic Nasal Spray                            | COLDAMARS prophylactic Baby Nasal Spray      | Coldam aris Flu                              |                                                            | Coldam aris Throat Spray           |                                |
| Ireland              |                                                                 |                                              |                                              | Lem sip First Signs                                        |                                    |                                |
| Israel               | Betadine Cold Defence Nasal Spray                               |                                              |                                              |                                                            |                                    |                                |
| Italy                | Lontax Pro                                                      | Lontax Pro Junior                            | Lontax Plus                                  | Physiom er Virus Defense                                   | Lontax Gola Spray Orale            | Lontax Gola Caram elle         |
| Kuwait               | Betadine Cold Defence Nasal Spray                               | Betadine Cold Defence Children's Nasal Spray |                                              |                                                            |                                    |                                |
| Latvia               |                                                                 |                                              | Agovirax Nasal Spray                         |                                                            |                                    |                                |
| Lebanon              | Betadine Cold Defence Nasal Spray                               | Betadine Cold Defence Children's Nasal Spray |                                              |                                                            |                                    |                                |
| Lichtenstein         |                                                                 |                                              |                                              | ProSens Nasenspray protect & relief                        |                                    |                                |
| Lithuania            |                                                                 |                                              | Agovirax Nasal Spray                         |                                                            |                                    |                                |
| Malaysia             | Betadine Cold Defence Nasal Spray                               | Betadine Kids Cold Defence Nasal Spray       |                                              |                                                            |                                    |                                |
| Moldova              |                                                                 |                                              | GripVis Nasal Spray                          |                                                            |                                    |                                |
| New Zealand          |                                                                 |                                              | FLO Travel Nasal Spray                       |                                                            |                                    | Viruseptin Lozenges            |
| Norway               |                                                                 |                                              | Viruseptin Nose Spray                        | Physiom er Virus Defense                                   |                                    |                                |
| Oman                 | Betadine Cold Defence Nasal Spray                               | Betadine Cold Defence Children's Nasal Spray |                                              |                                                            |                                    |                                |
| Philippines          | Betadine Cold Defence Nasal Spray                               | Betadine Kids Cold Defence Nasal Spray       |                                              |                                                            |                                    |                                |
| Quatar               | Betadine Cold Defence Nasal Spray                               | Betadine Cold Defence Children's Nasal Spray |                                              |                                                            |                                    | GipVis Lozenges                |
| Romania              |                                                                 |                                              | GripVis Nasal Spray                          |                                                            | GripVis Throat Spray               |                                |
| Russia               |                                                                 |                                              | Quixx Barrier Nasal Spray                    |                                                            |                                    |                                |
| Saudia Arabia        | Betadine Cold Defence Nasal Spray                               | Betadine Cold Defence Children's Nasal Spray |                                              |                                                            |                                    |                                |
| Singapore            | Betadine Cold Defence Nasal Spray                               | Betadine Kids Cold Defence Nasal Spray       |                                              |                                                            |                                    | GripVis Lozenges               |
| Slovakia             |                                                                 |                                              | GripVis Nasal Spray                          |                                                            | GripVis Throat Spray               | Viruseptin Lozenges            |
| Sweden               |                                                                 |                                              | Viruseptin Nose Spray                        | Viruseptin Decongestant Spray                              | Viruseptin Throat Spray            |                                |
| Switzerland          |                                                                 |                                              | ProSens protect Nasenspray                   | ProSens Nasenspray protect & relief                        | ProSens Rachenspray                |                                |
| Thailand             | Betadine Cold Defence Nasal Spray                               | Betadine Kids Cold Defence Nasal Spray       |                                              |                                                            |                                    |                                |
| United Arab Emirates | Betadine Cold Defence Nasal Spray                               | Betadine Cold Defence Children's Nasal Spray |                                              |                                                            |                                    |                                |
| United Kingdom       |                                                                 |                                              | Dual Defence                                 | Lem sip First Signs                                        |                                    |                                |
| Vietnam              | Betadine Cold Defence Nasal Spray                               | Betadine Kids Cold Defence Nasal Spray       |                                              |                                                            |                                    |                                |

**Figure S5.** Worldwide approved iota-carrageenan containing products (nasal sprays, throat sprays, lozenges).
