# Supplementary material
Source: MDPI journal article supplement (https://www.mdpi.com/1661-3821/3/3/25)
Supplement: s1 [file s1]

Archive with 2 entries (2 files):
- nutraceuticals-2425634 - Figure S1.pptx
- nutraceuticals-2425634-supplementary.pdf
